# Supplementary material
Source: Springer Nature journal article supplement (https://www.springermedizin.de/resource/supplementary/12931_2011_1103_MOESM2_ESM.pdf/9425654)

$\alpha_5$ 

FoxA2

E18.5

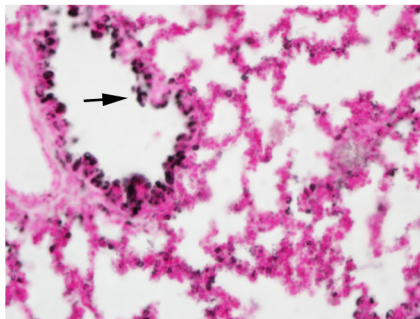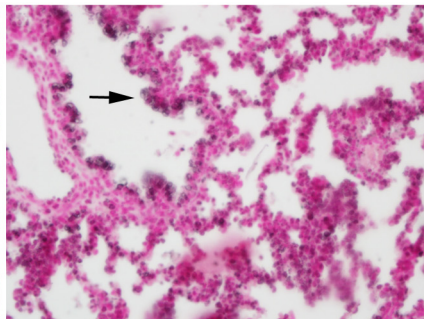

PN1

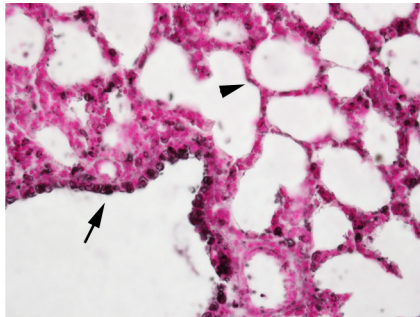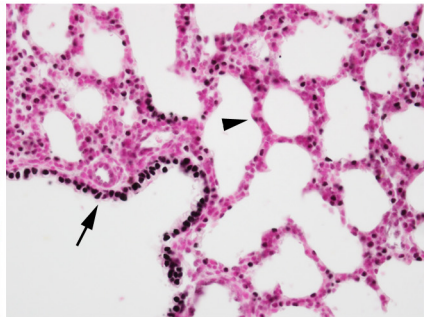

PN4

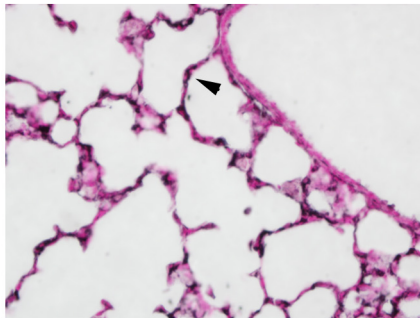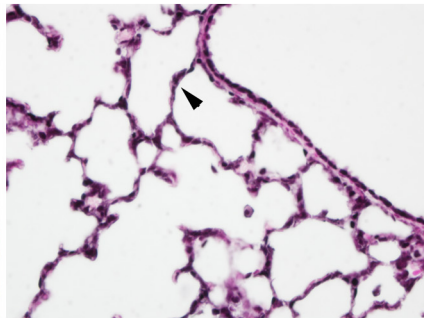

PN20

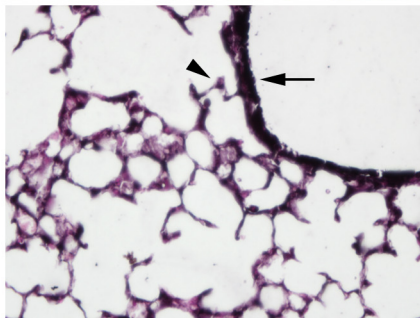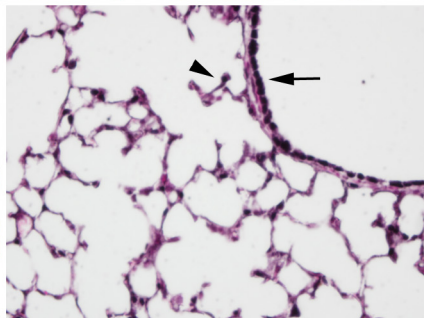

Supplement: MOESM2 [file 9425654]
